# Supplementary material
Source: PubMed Central journal article supplement (PMC3785718)
Supplement: 1300787110_pnas.201300787SI.pdf [file 1300787110_pnas.201300787SI.pdf]

# Supporting Information

Irvine et al. 10.1073/pnas.1300787110

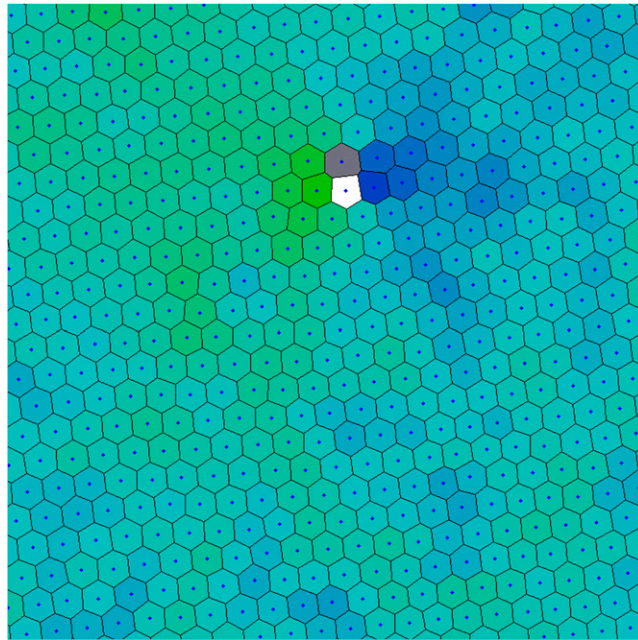

**Movie S1.** Control of dislocations with topological tweezers. Glide can be induced by shearing the lattice on either side of a dislocation.

[Movie S1](#)

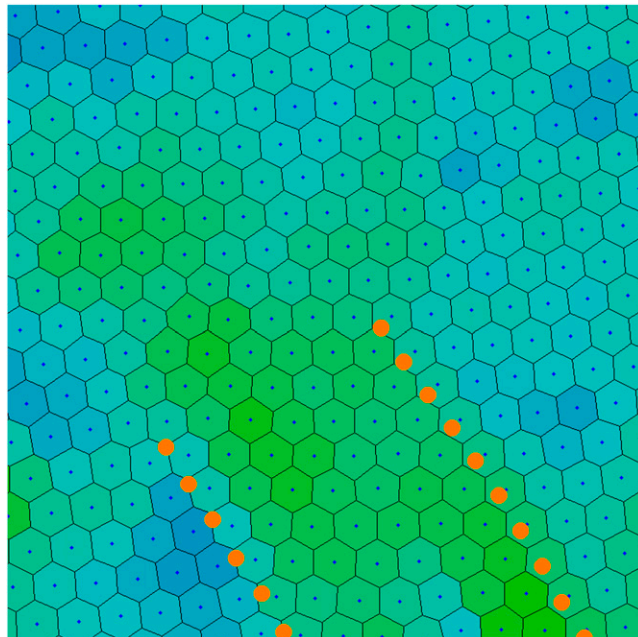

**Movie S2.** Control of dislocations with topological tweezers. Fissioning of a pair of dislocations by shearing a defect-free region of the lattice beyond the elastic regime.

[Movie S2](#)

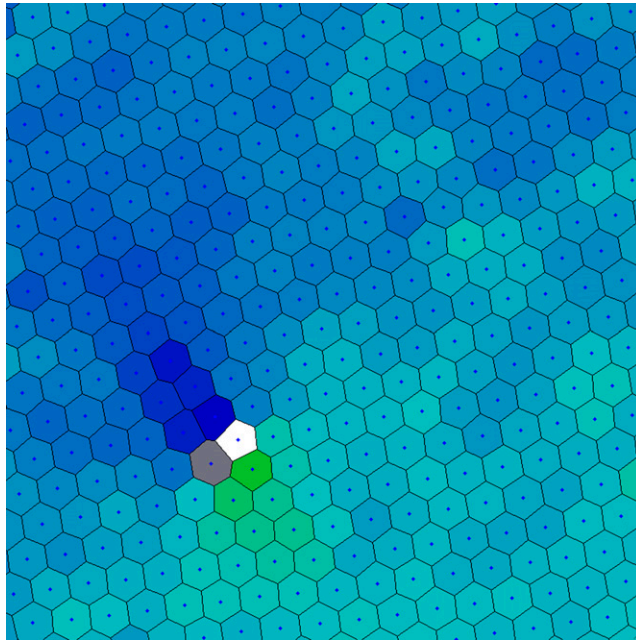

**Movie S3.** Control of dislocations with topological tweezers. A climb force applied by dilating the lattice on one side of the dislocation results in the fissioning of the dislocation into a pair which by its joint gliding motion moves in the climb direction of the original dislocation.

[Movie S3](#)

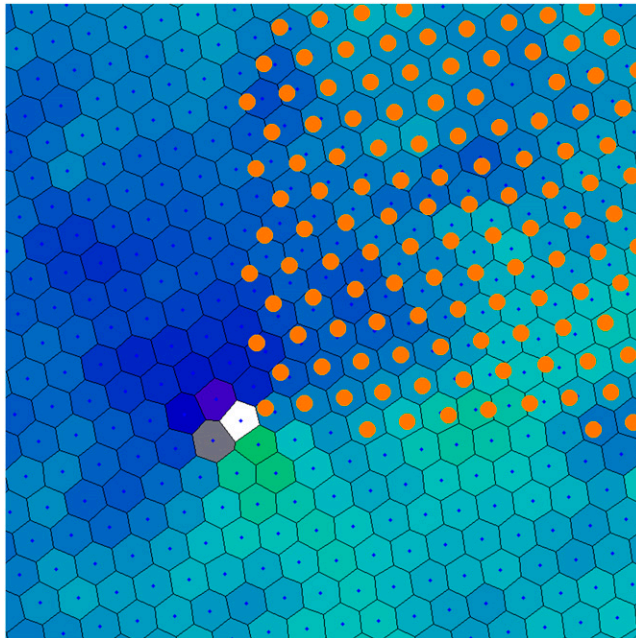

**Movie S4.** Control of dislocations with topological tweezers. A climb force applied by dilating the lattice on one side of the dislocation results in the fissioning of the dislocation into a pair which by its joint gliding motion moves in the climb direction of the original dislocation.

[Movie S4](#)

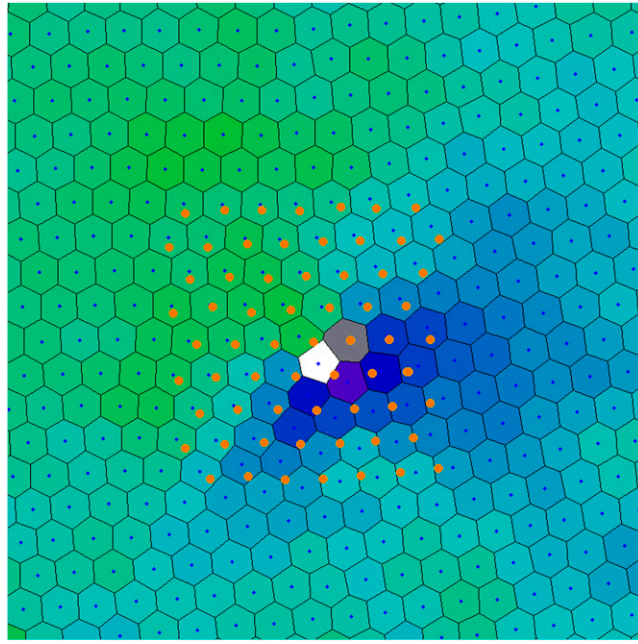

**Movie S5.** Control of dislocations with topological tweezers. Application of a commensurate set of traps results in the fissioning of a dislocation into a pair.

[Movie S5](#)

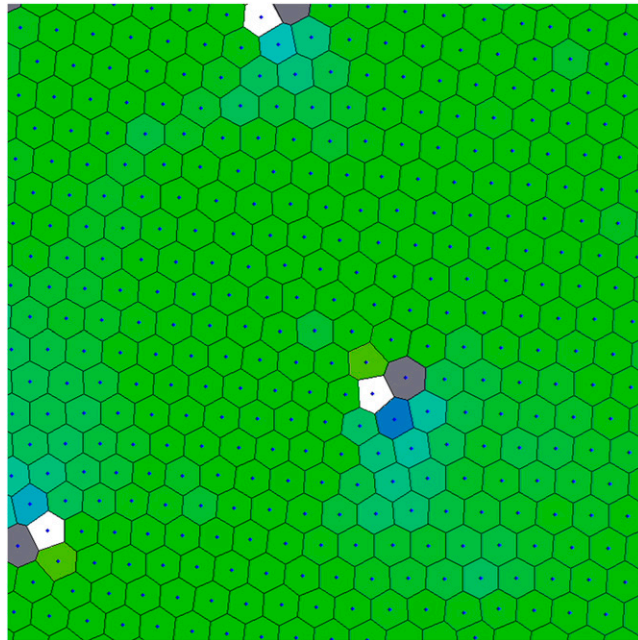

**Movie S6.** Control of dislocations with topological tweezers. Opposing shear stresses trap a dislocation which can then be moved along its glide plane.

[Movie S6](#)

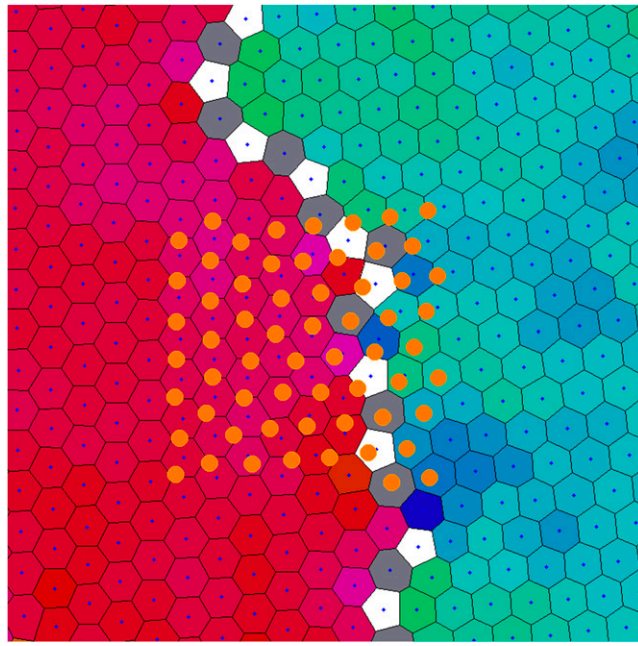

**Movie S7.** Control of dislocations with topological tweezers. Application of a commensurate potential, aligned with one side of a grain over a grain boundary, is capable of moving the grain boundary.

[Movie S7](#)

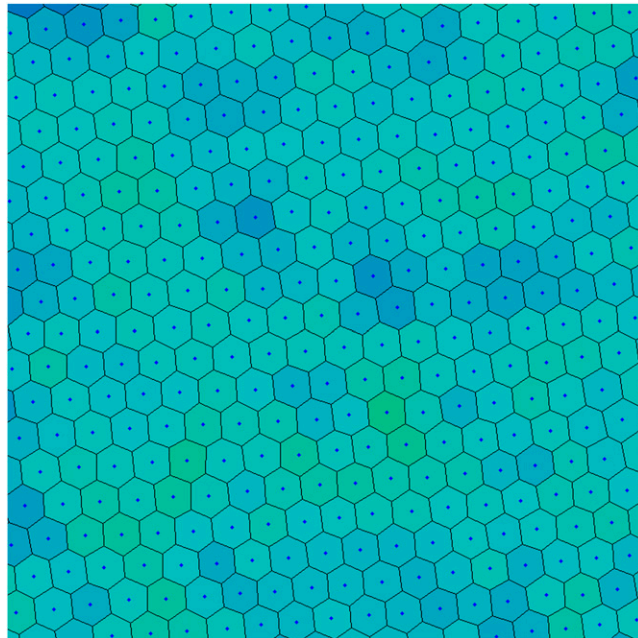

**Movie S8.** Topological defect dynamics in the formation and rotation of a grain. A commensurate set of traps was rotated counterclockwise from  $0^\circ$  to  $60^\circ$  in  $6^\circ$  steps, giving rise, through a series of cooperative topological defect dynamics, to a grain with boundary.

[Movie S8](#)

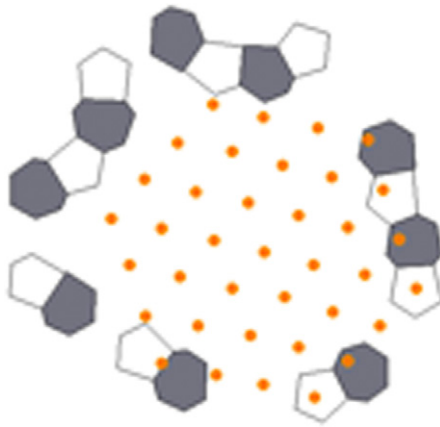

**Movie S9.** Topological defect dynamics in the formation and rotation of a grain. A commensurate set of traps was rotated counterclockwise from  $0^\circ$  to  $60^\circ$  in  $6^\circ$  steps, giving rise, through a series of cooperative topological defect dynamics, to a grain with boundary. In this rendition, only the topological tweezers and defects are shown.

[Movie S9](#)

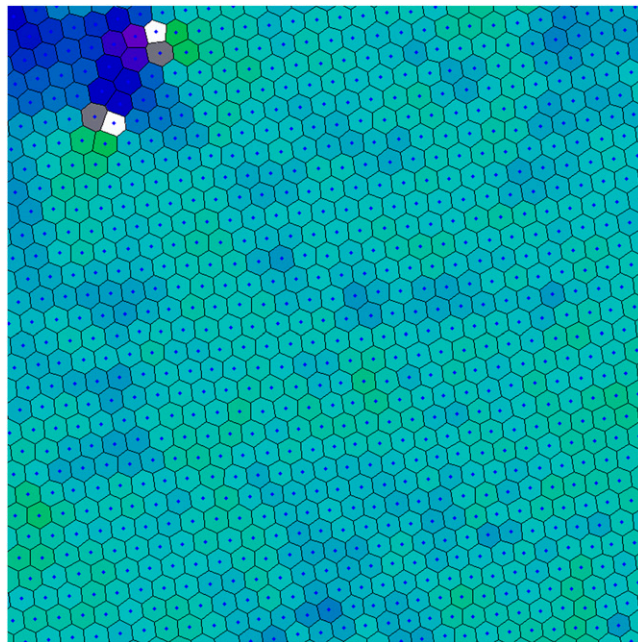

**Movie S10.** Topological defect dynamics in the formation, rotation, and destruction of a grain. A commensurate set of traps was rotated counterclockwise from  $0^\circ$  to  $60^\circ$  in  $6^\circ$  steps and then back. The rotation gives rise, through a series of cooperative topological defect dynamics, to a grain with boundary. When the rotation is reversed, the system does not however return to its original state.

[Movie S10](#)

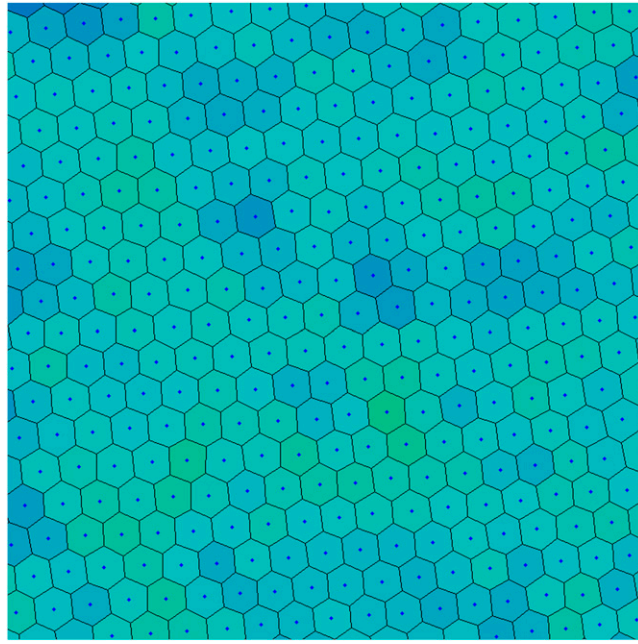

**Movie S11.** Topological defect dynamics in the formation, rotation, and destruction of a grain. A commensurate set of traps was rotated counterclockwise from  $0^\circ$  to  $60^\circ$  in  $6^\circ$  steps and then back. The rotation gives rise, through a series of cooperative topological defect dynamics, to a grain with boundary. When the rotation is reversed, the system does not however return to its original state.

[Movie S11](#)
